# Supplementary material for: Petrochemical Wastewater Treatment by Eggshell Modified Biochar as Adsorbent: Atechno-Economic and Sustainable Approach
Source: Hindawi journal article supplement (doi:10.1155/2022/2323836), 2022-01-01
Supplement: f1 [file 2323836.f1.docx]

**Supplementary of “Petrochemical Wastewater Treatment by Eggshell Modified Biochar as Adsorbent: A Techno-Economic and Sustainable Approach”**

**Points of zero charge (pHpzc) of the biochar adsorbents**

Fig. S1 shows the pH value at the point of zero charge (pHpzc) for biochar (BC) and eggshell modified biochar (EMBC) for removing toluene and xylene (TX) from aqueous solutions. When the solution pH is below pHpzc of biochars, the surface charge becomes positive due to the excess H+ ion distributed on the surface functional groups (i.e., protonation) (Yunus et al., 2020). These extremely protonated sorption sites were incapable of binding the TX molecules. On the contrary, the biochar surface would acquire more negative charges by accumulating OH- ions at pH > pHpzc, reducing the migration of TX from the bulk solution to the biochar surface.

Fig. S1. pH value at the point of zero charge (pHpzc) for biochar (BC) and eggshell modified biochar (EMBC).

**Isotherm study**

**Langmuir isotherm**

The Langmuir isotherm model assumes that adsorption occurs at specific locations on the adsorbent surface, with no further interactions between the adsorbate molecules (Langmuir, 1918). Hence, the adsorbate molecules tend to form a complete monolayer coverage within homogeneous internal sites. The adsorption data of the equilibrium assays were fitted to the linear equation of Langmuir isotherm (Eq. S1).

(Eq. S1)

where, Ce denotes residual TX concentration in solution at equilibrium (mg/L), qe and qm are equilibrium and maximum/monolayer adsorption capacities, respectively (mg/g), and KL is the Langmuir constant describing the affinity of the binding sites (L/mg).

Fig. S2(a) shows the linear regression of Ce/qe versus Ce, obtaining a straight line with an intercept of (1/KL·qm) and a slope of 1/qm. The maximum amount of adsorbate covering the sorbent surface ranged as qm: 38.82 – 42.92 mg/g for toluene and qm: 42.74 – 47.10 mg/g for xylene (Table S1).

The essential characteristics of Langmuir isotherm can be defined by a separation factor or equilibrium constant, RL, which is given by Eq. S2 (Langmuir, 1918):

(Eq. S2)

The values of RL are associated with the ratio of the remaining to the total adsorption capacities (Tang et al., 2019). The RL values distributed between 0 and 1, indicating the suitability of the adsorption process (Zhang et al., 2011).

**Freundlich isotherm**

The Freundlich model assumes that the adsorbent sites have diverse affinities for the adsorbate, in which the sites with the highest attractive forces are initially filled/occupied (Freundlich, 1906). The Freundlich isotherm model is used to estimate the adsorbent heterogeneity, involving both monolayer and multilayer adsorptions (Yang et al., 2018). The linearized Freundlich isotherm is represented by Eq. S3.

(Eq. S3)

where, Ce is the solute concentration (mg/L) at equilibrium, qe is the adsorption capacity (mg/g) at equilibrium, and KF ((mg/g·(L/mg)1/n) and n (dimensionless) are the Freundlich adsorption isotherm constants associated with the saturation capacity and intensity of adsorption, respectively.

The parameters of Freundlich isotherm (KF and n) were estimated by linear regression from the relationship ln(qe) vs. ln(Ce), as shown in Fig. S2(b). The KF values estimated from the modified biochar (10.22 – 13.98 mg/g (L/mg)1/n) were higher than those obtained from the raw biochar (3.15 – 4.98 mg/g (L/mg)1/n), deducing that EMBC had a higher adsorption capacity.

The estimated Langmuir and Freundlich isotherm parameters were used to estimate the qe values, using the non-linear equations (Eqs. S4 and S5).

(Eq. S4)

(Eq. S5)

It can be noticed from Fig. S2(c – d) that the accuracy of the Langmuir model to fit the adsorption data was higher than the Freundlich isotherm. Hence, the TX molecules would form a uniform monolayer on the biochar surface within specific sites having equivalent sorption energy. In addition, all binding sites on biochars have equal affinity for the TX sorbate.

Fig. S2. Isotherm studies for adsorption of toluene and xylene (TX) onto biochar (BC) and eggshell-modified biochar (EMBC): (a) Langmuir isotherm (linear model), (b) Freundlich isotherm (linear model), (c) Langmuir isotherm (non-linear model), and (d) Freundlich isotherm (non-linear model).

Table S1. Langmuir and Freundlich isotherms for adsorption of toluene and xylene (TX) onto biochar (BC) and eggshell-modified biochar (EMBC).

| Adsorbate | Adsorbent | Langmuir isotherm | | | | Freundlich isotherm | | |
| --- | --- | --- | --- | --- | --- | --- | --- | --- |
| *q*m (mg/g) | *K*L (L/mg) | *R*L | *R*2 | *K*F ((mg/g (L/mg)1/n) | *n* | *R*2 |
| Toluene | BC | 38.82 | 0.04 | 0.197 | 0.966 | 3.15 | 1.94 | 0.858 |
| EMBC | 42.92 | 0.12 | 0.052 | 0.985 | 10.22 | 3.32 | 0.772 |
| Xylene | BC | 42.74 | 0.09 | 0.121 | 0.973 | 4.98 | 2.38 | 0.843 |
| EMBC | 47.10 | 0.18 | 0.040 | 0.990 | 13.98 | 4.30 | 0.776 |

**Adsorption kinetics**

**Pseudo-first-order**

The linear form of the pseudo-first-order kinetic model is expressed by Eq. S6.

(Eq. S6)

where, *k*1 is the Lagergren rate constant of adsorption (1/min), and qe (mg/g) and qt (mg/g) are the quantities of the adsorbed substance at equilibrium and time t, respectively.

Fig. S3(a and b) shows the plot of log(qe – qt) versus t, yielding a linear curve with a slope *k*1/2.303 and an intercept log(qe). The equilibrium capacity calculated from the pseudo-first-order model (qe,calc) deviated largely from the corresponding experimental values (qe,exp). Although this equation has been widely used to interpret the adsorption data (Table S2), it showed large deviations in fitting procedures. Accordingly, the adsorption of TX onto BC and EMBC could not follow the pseudo-first-order reaction.

**Pseudo-second-order**

The linear form of the pseudo-second-order kinetic model is given by Eq. S7 (Ho and McKay, 1999).

(Eq. S7)

where, *k*2 is the pseudo-second-order rate constant of adsorption (g/(mg·min)).

Figs. S3(c and d) show the plot of t/qt vs. t, resulting in a linear curve with a slope 1/qe and an intercept 1/(*k*2·qe2). The qe,calc values derived from the pseudo-second-order equation matched well to the qe,exp data at all Co, and the *R*2 values were almost 1.

**Intraparticle diffusion (IPD) model**

Weber and Morris (1963) proposed an intra-particle diffusion (IPD) model (Eq. S8) to elucidate whether film diffusion is the rate-limiting steps in the adsorption process or not.

(Eq. S8)

where, *K*ID is the rate constant of IPD model (mg/g/min0.5), t0.5 is the square root of adsorption time, and *I* is a constant that describes the thickness of the boundary layer (mg/g).

The linear plot of qt versus t1/2 is used to provide a slope “*K*ID” and an intercept “*I*”. The IPD curves were divided into two consecutive stages, with high R2 values (Figs. S3e and f). Accordingly, the TX molecules properly transferred from the bulk solution to the exterior surface of biochar, followed by gradual film diffusion; finally, the pore diffusion mechanism occurred (Guo et al., 2015).

Fig. S3. Kinetic studies for adsorption of toluene and xylene (TX) onto biochar (BC) and eggshell-modified biochar (EMBC): (a) Pseudo-first-order model (Toluene), (b) Pseudo-first-order model (Xylene), (c) Pseudo-second-order model (Toluene), (d) Pseudo-second-order model (Xylene), (e) intraparticle diffusion model (Toluene), and (f) intraparticle diffusion model (Xylene).

Table S2. Kinetic parameters for adsorption of toluene and xylene (TX) onto biochar (BC) and eggshell-modified biochar (EMBC).

| Adsorbate | *C*ₒ (mg/L) | Biochar | *q*e, exp. (mg/g) | Pseudo-first-order model | | | Pseudo-second-order model | | | Intraparticle diffusion (IPD) model | | |
| --- | --- | --- | --- | --- | --- | --- | --- | --- | --- | --- | --- | --- |
| *k*1 (1/min) | *q*e, calc. (mg/g) | *R*2 | *k*2 (g/mg/min) | *q*e, calc.  (mg/g) | *R*2 | *K*ID  (mg/g/min1/2) | *I*  (mg/g) | *R*2 |
| Toluene | 40 | BC | 11.66 | 0.024 | 7.15 | 0.980 | 0.008 | 12.47 | 0.998 | 0.88 | 3.73 | 0.965 |
| 0.38 | 1.12 | 0.989 |
| EMBC | 14.88 | 0.028 | 8.41 | 0.984 | 0.009 | 15.92 | 0.994 | 0.74 | 8.25 | 0.968 |
| 0.34 | 5.17 | 0.951 |
| 100 | BC | 37.13 | 0.017 | 8.65 | 0.936 | 0.006 | 36.04 | 0.991 | 1.38 | 23.52 | 0.991 |
| 0.81 | 17.21 | 0.995 |
| EMBC | 42.60 | 0.021 | 14.91 | 0.983 | 0.007 | 41.86 | 0.999 | 0.78 | 35.47 | 0.959 |
| 0.57 | 33.26 | 0.971 |
| 200 | BC | 73.03 | 0.011 | 11.83 | 0.960 | 0.005 | 70.92 | 0.999 | 1.46 | 56.72 | 0.992 |
| 0.89 | 53.25 | 0.994 |
| EMBC | 83.69 | 0.014 | 13.70 | 0.950 | 0.006 | 82.47 | 0.999 | 0.92 | 72.14 | 0.948 |
| 0.84 | 71.48 | 0.997 |
| Xylene | 40 | BC | 13.38 | 0.026 | 7.82 | 0.859 | 0.009 | 15.72 | 0.978 | 1.19 | 4.17 | 0.989 |
| 0.70 | 2.19 | 0.981 |
| EMBC | 17.80 | 0.031 | 13.97 | 0.977 | 0.009 | 17.04 | 0.993 | 0.86 | 10.03 | 0.971 |
| 0.56 | 6.50 | 0.976 |
| 100 | BC | 40.22 | 0.018 | 10.37 | 0.984 | 0.006 | 38.76 | 0.997 | 1.79 | 24.31 | 0.957 |
| 1.28 | 21.91 | 0.934 |
| EMBC | 45.27 | 0.022 | 17.15 | 0.945 | 0.007 | 44.05 | 0.999 | 0.81 | 37.12 | 0.976 |
| 0.65 | 36.45 | 0.993 |
| 200 | BC | 76.65 | 0.014 | 13.64 | 0.946 | 0.005 | 75.19 | 0.999 | 1.80 | 58.86 | 0.889 |
| 1.47 | 55.32 | 0.994 |
| EMBC | 86.36 | 0.016 | 18.72 | 0.960 | 0.006 | 87.33 | 0.999 | 1.11 | 74.27 | 0.968 |
| 0.92 | 72.64 | 0.993 |

**Regeneration of EMBC and BC**

The ability to regenerate the biochar adsorbents, along with the recovery of the TX compounds, is an essential step regarding the economic point of view. The desorption process was conducted by adding 50 mL of 0.1M HNO3 solution to biochar loaded with TX at the equilibrium condition. The bottles were subjected to intermittent stirring for 30 min, and the suspension was decanted for TX concentration measurement. The separated biochar after desorption was filtered, washed with distilled water, and dried at 105 °C for 24 hr. After five consecutive adsorption-desorption cycles (Fig. S4a), 94.7% of toluene and 90.1% of xylene were desorbed from EMBC. These desorption abilities were better than the BC case that attained 82.5% and 72.7% of toluene and xylene, respectively. Fig. S4(b) also shows that the adsorption capacities of biochars gradually reduced after each cycle. Overall, EMBC re-adsorbed the highest amount of toluene and xylene, i.e., 40.99 mg/g and 40.15 mg/g compared to 30.07 mg/g and 29.74 mg/g by BC. A lower desorption and regeneration of BC compared to EMBC could be associated with the amount of occupied pores after the first cycle of adsorption.

Fig. S4. (a) desorption of toluene and xylene from biochars (BC and EMBC) for five consecutive adsorption-desorption cycles, and (b) reusability of biochars for five consecutive adsorption-desorption cycles.

.

**References**

Freundlich, H., 1906. Over the adsorption in solution.. *J. Phys. Chem.,* Volume 57, pp. 385-471.

Guo, Z., Liu, X., Huang, H. & Peters, M., 2015. Kinetics and thermodynamics of reserpine adsorption onto strong acidic cationic exchange fiber. *PLoS ONE,* 10(9), p. e0138619.

Ho, Y. & McKay, G., 1999. Pseudo-second order model for sorption processes. *Process Biochem.,* Volume 34, pp. 451-465.

Langmuir, I., 1918. The adsorption of gases on plane surfaces of glass, mica and platinum.. *J. Am. Chem. Soc.,* 40(9), pp. 1361-1403.

Tang, Y. et al., 2019. Influence of pyrolysis temperature on production of digested sludge biochar and its application for ammonium removal from municipal wastewater. *Journal of Cleaner Production,* Volume 209, pp. 927-936.

Weber, W. & Morris, J., 1963. Kinetics of adsorption on carbon from solutions. *J. Sanit. Eng. Div. Am. Soc. Civ. Eng.,* Volume 89, pp. 31-60.

Yang, X. et al., 2018. Behaviors and kinetics of toluene adsorption‐desorption on activated carbons with varying pore structure. *Journal of Environmental Sciences (China),* Volume 67, pp. 104-114.

Yunus, Z. et al., 2020. Removal of heavy metals from mining effluents in tile and electroplating industries using honeydew peel activated carbon: A microstructure and techno-economic analysis. *Journal of Cleaner Production,* Volume 251, p. 119738.

Zhang, L. et al., 2011. Adsorption behavior of multi-walled carbon nanotubes for the removal of olaquindox from aqueous solutions. *Journal of Hazardous Materials,* Volume 197, pp. 389-396.
